# Supplementary material for: Growth, Toxin Production and Allelopathic Effects of Pseudo-nitzschia multiseries under Iron-Enriched Conditions
Source: Mar Drugs. 2017 Oct 24;15(10):331. doi: 10.3390/md15100331 (PMC5666437; doi:10.3390/md15100331)
Supplement: Supplementary file 1 [file marinedrugs-15-00331-s001.pdf]

**Table S1** Results of the analysis of variance (ANOVA) and SNK multiple comparison tests for cell density, growth rate between days 0 and 8 of culture ( $\mu_{0-8}$ ) and maximum growth rate ( $\mu$ ) of *Pseudo-nitzschia multiseriis* and *Bacillaria* sp. Mean values were compared across treatments that received the addition of distinct iron (*Fe*) concentrations, in nmol.L<sup>-1</sup> (Tr: +0*Fe*; +1.7*Fe*; +10*Fe*; +11,700*Fe*). For *Bacillaria* sp., an extra treatment (+1.7*Fe*+*Psm*) was created with the addition of 1.7 nmol Fe.L<sup>-1</sup> and the dissolved cell content from a *P. multiseriis* culture containing 52 ng DA.mL<sup>-1</sup> and other undetermined compounds. Significant terms of interest ( $\alpha = 0.05$ ) are highlighted in bold.

| <i>P. multiseriis</i> cell density                  |    |           |        |        | <i>Bacillaria</i> sp. cell density                                                              |           |        |               |
|-----------------------------------------------------|----|-----------|--------|--------|-------------------------------------------------------------------------------------------------|-----------|--------|---------------|
|                                                     | df | MS        | F      | p      | df                                                                                              | MS        | F      | p             |
| Tr                                                  | 3  | 233543906 | 3.0955 | 0.0675 | 4                                                                                               | 70867500  | 6.3477 | <b>0.0176</b> |
| Residual                                            | 12 | 75446719  |        |        | 7                                                                                               | 11164286  |        |               |
| SNK test                                            | –  |           |        |        | +0 <i>Fe</i> = +1.7 <i>Fe</i> = +10 <i>Fe</i> = +11,700 <i>Fe</i> = +1.7 <i>Fe</i> + <i>Psm</i> |           |        |               |
| <i>P. multiseriis</i> growth rate ( $\mu_{0-8}$ )   |    |           |        |        | <i>Bacillaria</i> sp. growth rate ( $\mu_{0-8}$ )                                               |           |        |               |
|                                                     | df | MS        | F      | p      | df                                                                                              | MS        | F      | p             |
| Tr                                                  | 3  | 0.0098    | 2.5812 | 0.1020 | 4                                                                                               | 0.0237504 | 20.772 | <b>0.0006</b> |
| Residual                                            | 12 | 0.0038    |        |        | 7                                                                                               | 0.0011434 |        |               |
| SNK test                                            | –  |           |        |        | +0 <i>Fe</i> = +1.7 <i>Fe</i> = +10 <i>Fe</i> = +11,700 <i>Fe</i> > +1.7 <i>Fe</i> + <i>Psm</i> |           |        |               |
| <i>P. multiseriis</i> maximum growth rate ( $\mu$ ) |    |           |        |        | <i>Bacillaria</i> sp. maximum growth rate ( $\mu$ )                                             |           |        |               |
|                                                     | df | MS        | F      | p      | df                                                                                              | MS        | F      | p             |
| Tr                                                  | 3  | 0.0303    | 2.0327 | 0.1631 | 4                                                                                               | 0.1992    | 8.057  | <b>0.0093</b> |
| Residual                                            | 12 | 0.0149    |        |        | 7                                                                                               | 0.0247    |        |               |
| SNK test                                            | –  |           |        |        | +0 <i>Fe</i> = +1.7 <i>Fe</i> = +10 <i>Fe</i> = +11,700 <i>Fe</i> > +1.7 <i>Fe</i> + <i>Psm</i> |           |        |               |

**Table S2** Results of the analysis of variance (ANOVA) and SNK multiple comparison tests for intra- and extracellular domoic acid (DA) concentrations. Mean values were compared across treatments that received the addition of distinct iron (*Fe*) concentrations, in nmol.L<sup>-1</sup> (Tr: +0*Fe*; +1.7*Fe*; +10*Fe*; +11,700*Fe*), sampling times (Tm: 4; 8; 17; 30 d), and the interaction between them. Significant terms of interest ( $\alpha = 0.05$ ) are highlighted in bold.

| DA (pg.cell <sup>-1</sup> ) |    |               |              |                             |                                                                |               |              |                            |           |
|-----------------------------|----|---------------|--------------|-----------------------------|----------------------------------------------------------------|---------------|--------------|----------------------------|-----------|
|                             |    | Intracellular |              |                             |                                                                | Extracellular |              |                            |           |
|                             | Df | MS            | F            | p                           | SNK                                                            | MS            | F            | p                          | SNK       |
| Tr                          | 3  | 1.89          | <b>6.66</b>  | <b>7.5×10<sup>-4</sup></b>  | +10 <i>Fe</i> =+1.7 <i>Fe</i> =+0 <i>Fe</i> <+11,700 <i>Fe</i> | 1.91          | 1.009        | 0.39                       | N/A*      |
| Tm                          | 3  | 33.1          | <b>116.6</b> | <b>2.2×10<sup>-16</sup></b> | 4<8<17<30                                                      | 41.08         | <b>21.60</b> | <b>5.4×10<sup>-9</sup></b> | 8=4=30<17 |
| Tr×Tm                       | 9  | 0.48          | 1.70         | 0.11                        | N/A*                                                           | 3.18          | 1.67         | 0.12                       | N/A*      |

\* N/A: not applicable.

**Table S3** Results of the analysis of variance (ANOVA) and SNK multiple comparison tests for the total (µg.L<sup>-1</sup>) and intracellular (pg.cell<sup>-1</sup>) chlorophyll-*a* concentrations in *Bacillaria* sp. cultures. Mean values were compared across treatments that received the addition of distinct iron (*Fe*) concentrations (nmol.L<sup>-1</sup>), or iron and the dissolved cell content from a *P. multiseri* (*Psm*) culture (Tr: +0; +1.7; +10; +11,700; and +1.7+*Psm*), sampling times (Tm: 4; 8; 17; 30 d), and the interaction between them. Significant terms of interest ( $\alpha = 0.05$ ) are highlighted in bold. See methods for details.

| Total chlorophyll- <i>a</i> (µg.L <sup>-1</sup> ) |    |      |      |                       | Intracellular chlorophyll- <i>a</i> (pg.cell <sup>-1</sup> ) |      |      |                      |                                               |
|---------------------------------------------------|----|------|------|-----------------------|--------------------------------------------------------------|------|------|----------------------|-----------------------------------------------|
|                                                   | Df | MS   | F    | P                     | SNK                                                          | MS   | F    | P                    | SNK                                           |
| Tr                                                | 4  | 0.55 | 4.19 | 0.012                 |                                                              | 0.86 | 3.30 | 0.03                 |                                               |
| Tm                                                | 3  | 9.27 | 70.6 | 8.1x10 <sup>-11</sup> |                                                              | 0.41 | 1.57 | 0.22                 |                                               |
| Tr×Tm                                             | 12 | 2.30 | 17.5 | 4.8x10 <sup>-8</sup>  | Day 04: +1.7+ <i>Psm</i> =+0=+10<+1.7<+11,700                |      |      |                      | Day 04: +0=+1.7+ <i>Psm</i> =+10<+1.7<+11,700 |
|                                                   |    |      |      |                       | Day 08: +1.7+ <i>Psm</i> <+0<+10=+1.7<+11,700                |      |      |                      | Day 08: +0=+10=+1.7+ <i>Psm</i> =+1.7<+11,700 |
|                                                   |    |      |      |                       | Day 17: +1.7+ <i>Psm</i> =+11,700=+0=+10=+1,7                | 0.86 | 3.33 | 8.5x10 <sup>-3</sup> | Day 17: +10=+1.7+ <i>Psm</i> =+0=+11,700=+1.7 |
|                                                   |    |      |      |                       | Day 30: +11,700<+0=+1,7<+10=+1.7+ <i>Psm</i>                 |      |      |                      | Day 30: +11,700<+1.7=+0=+1.7+ <i>Psm</i> <+10 |
